# Supplementary figures and images for: Profiling Human CD55 Transgene Performance Assist in Selecting Best Suited Specimens and Tissues for Swine Organ Xenotransplantation
Source: MDPI journal article supplement (doi:10.3390/biology10080747), 2021-08-04

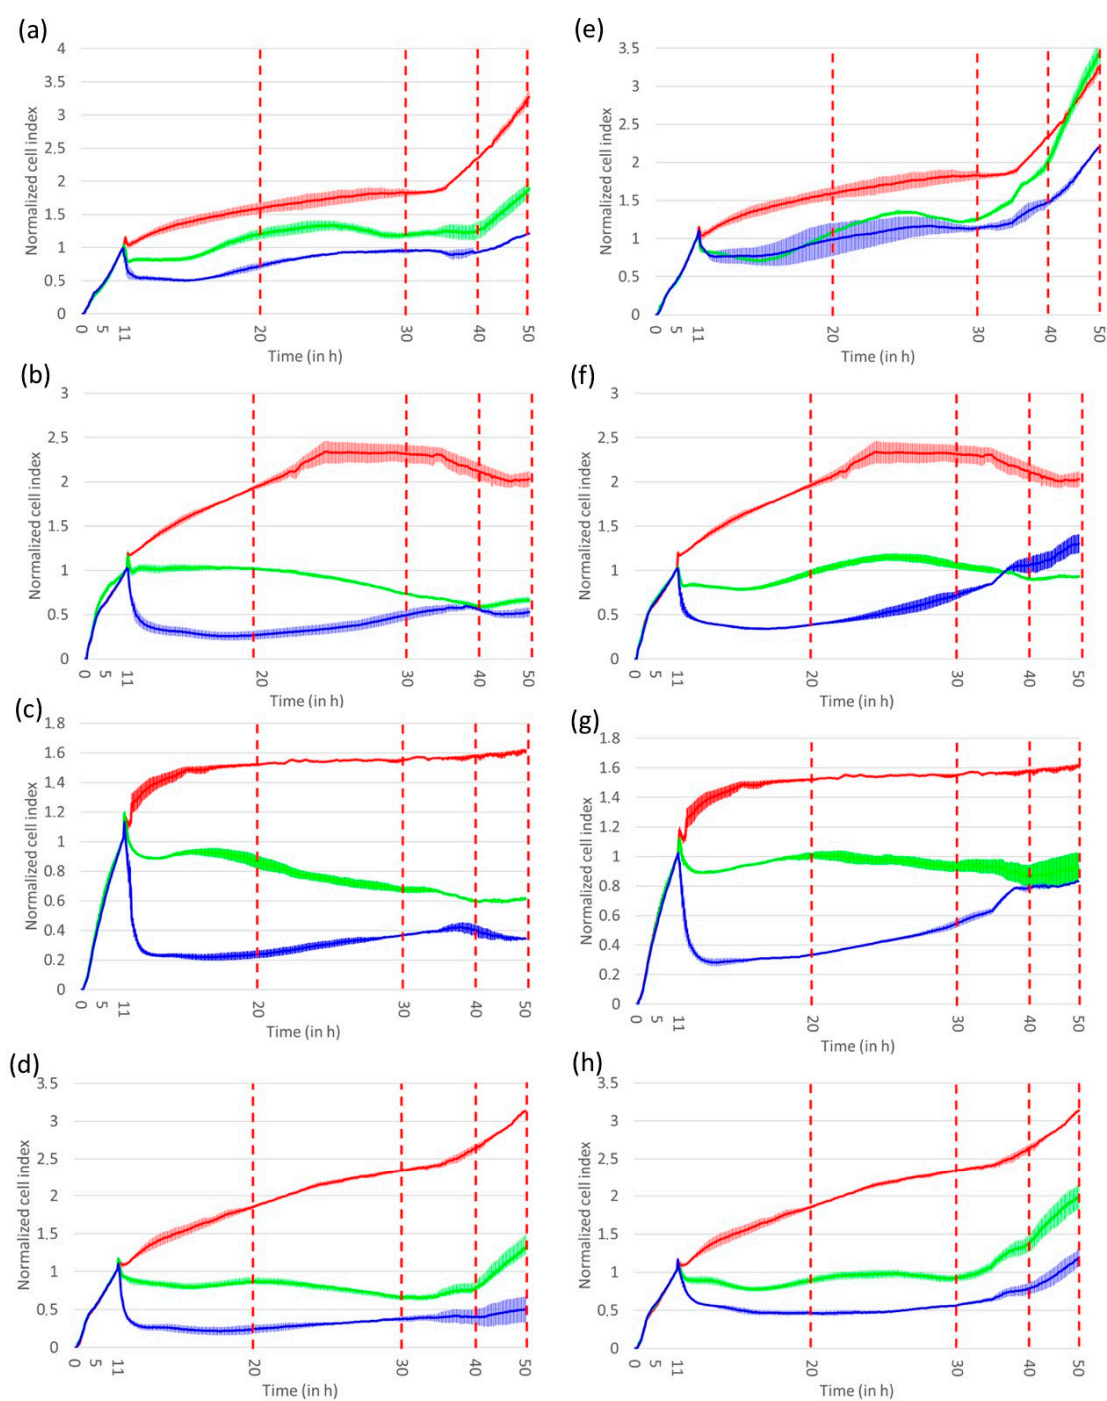

Supplement: s1 [file s1]
